# Supplementary material for: A La-doped ZnO ultra-flexible flutter-piezoelectric nanogenerator for energy harvesting and sensing applications: a novel renewable source of energy
Source: Royal Society of Chemistry journal article supplement (doi:10.1039/c9nr02560j), 2019-01-01
Supplement: c9nr02560j1.pdf [file c9nr02560j1.pdf]

## Supporting Information

# La-doped ZnO ultra-flexible flutter-Piezoelectric Nanogenerator for Energy Harvesting and Sensing Applications: A Novel Renewable Source of Energy

*Rajagopalan Pandey*<sup>1</sup>, *Gaurav Khandelwal*<sup>2</sup>, *Palani Iyamperumal Anand*<sup>1,3\*</sup>, *Vipul Singh*<sup>4</sup>,  
*Sang-Jae Kim*<sup>2\*</sup>

<sup>1</sup>Mechatronics and Instrumentation Lab, Discipline of Metallurgy Engineering and Materials Science, Indian Institute of Technology Indore, Indore, 453552, India.

<sup>2</sup> Nano materials and Systems Lab, Department of Mechatronics Engineering, Jeju National University, Jeju, 63243, South Korea

<sup>3</sup>Mechatronics and Instrumentation Lab, Discipline of Mechanical Engineering, Indian Institute of Technology Indore, Indore, 453552, India.

<sup>4</sup>Molecular and Nano-electronics Research Group (MNRG), Discipline of Electrical Engineering, Indian Institute of Technology Indore, Indore, 453552, India.

\* E-mail: [kimsangj@jejunu.ac.kr](mailto:kimsangj@jejunu.ac.kr), [palania@iiti.ac.in](mailto:palania@iiti.ac.in),

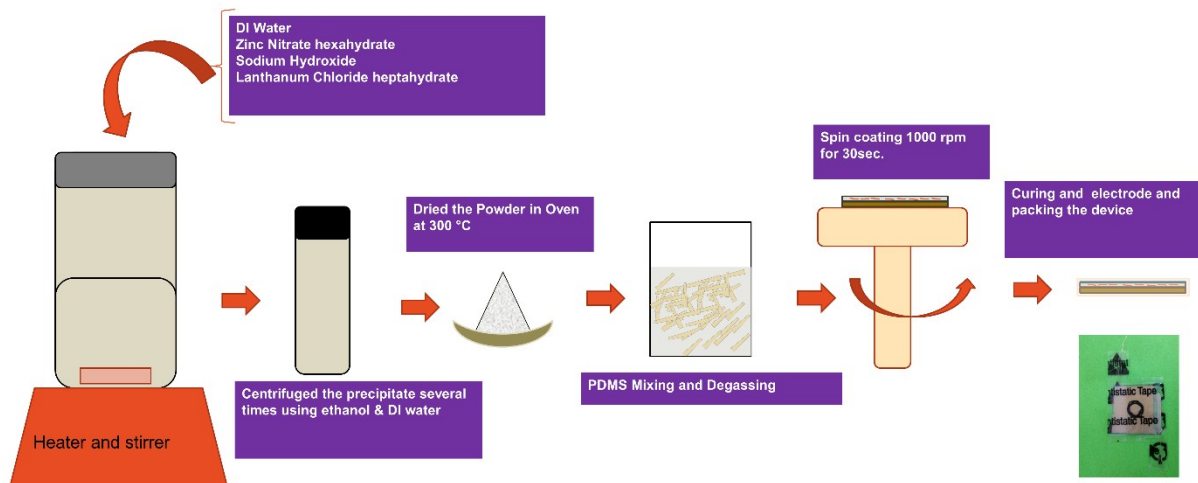

**Figure S1.** Schematic diagram of material and device fabrication and packaging

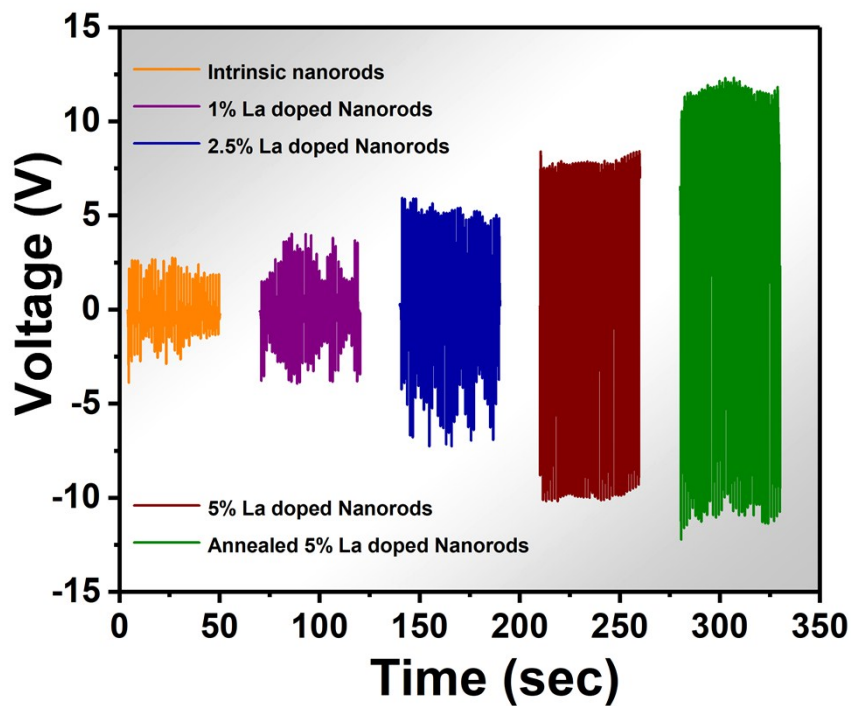

**Figure S2.** Optimization of Lanthanum dopant in ZnO. The data shows the piezoelectric output of ZnO samples doped in various percentage of Lanthanum

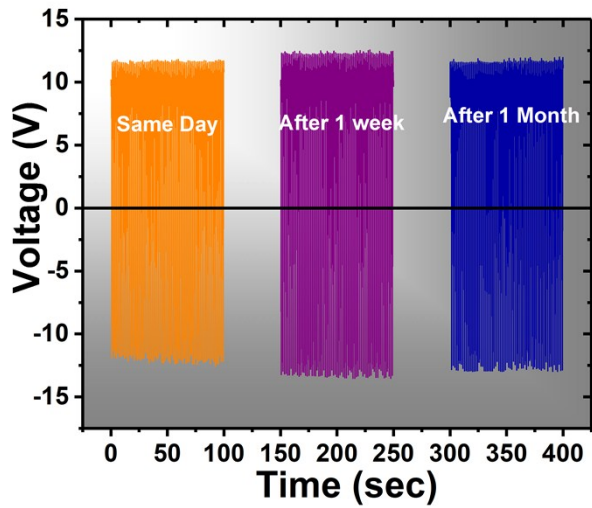

**Figure S3.** Long term stability of La-doped Device.

**Table T1.** Parameters used in the simulation

| Sr. No. | Parameters               | Value                        |
|---------|--------------------------|------------------------------|
| 1       | Radius of the bluff body | 30 mm                        |
| 2.      | Fluid                    | Air                          |
| 3.      | Density                  | 1.022 Kg/m <sup>3</sup>      |
| 4.      | Specific density         | 1.81 × 10 <sup>-5</sup> Pa-s |
| 5.      | Temperature              | 293.15 K                     |
| 6.      | Mean Velocity            | 2.8 , 3.4, 3.8 m/s           |

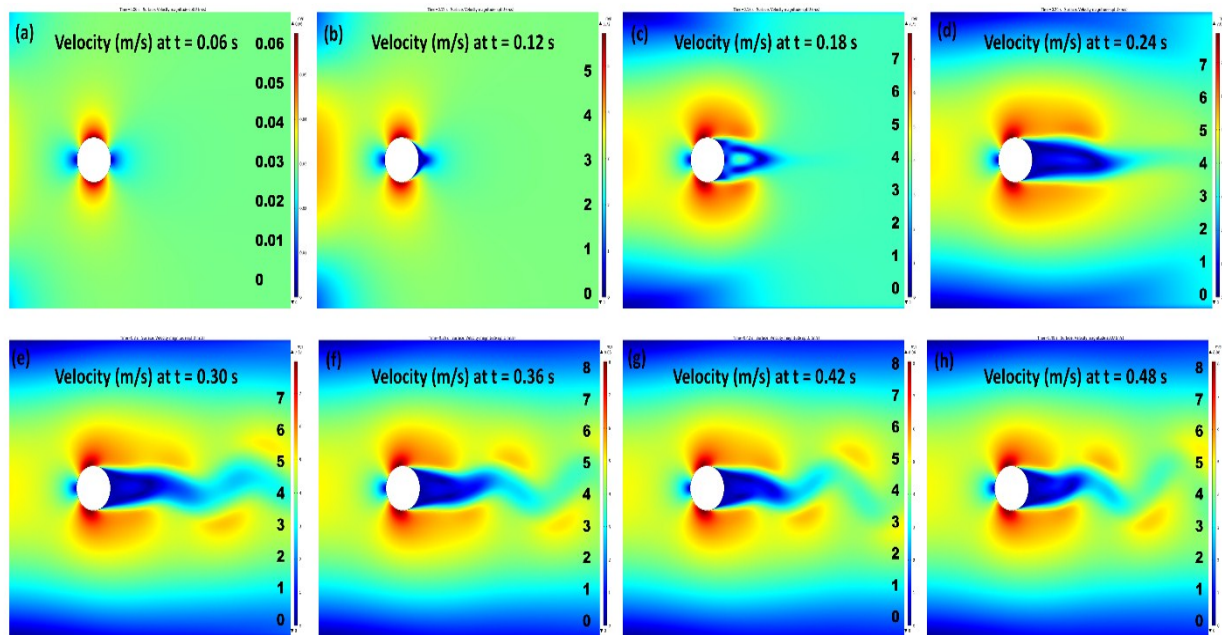

**Figure S4.** Time-dependent flow velocity variations around the body at  $t = 0.06, 0.12, 0.18, 0.24, 0.30, 0.36, 0.42, 0.48$  s.
